# Supplementary material for: A FRET-based ratiometric fluorescent probe for sensing trace water in organic solvents
Source: Royal Society of Chemistry journal article supplement (doi:10.1039/c9ay00648f), 2019-01-01
Supplement: c9ay00648f1.pdf [file c9ay00648f1.pdf]

**Support information for**

**A FRET-based ratiometric fluorescence probe for sensing trace  
water in organic solvents**

Di Yang<sup>†</sup>, Xiang-Jian Cao<sup>†</sup>, Xiao-Tian Wu, Zai-Xiao Yang, Bao-Xiang Zhao\*

Institute of Organic Chemistry, School of Chemistry and Chemical Engineering,

Shandong University, Jinan 250100, P.R. China. E-mail: bxzhao@sdu.edu.cn

<sup>†</sup> The two authors contributed equally.

## Computational section

All the calculations were implemented with the Gaussian09 program package. The structures of these molecules in transition state were optimized using the density functional theory (DFT), cam-b3lyp with the 6-31 g\* basis set. Vibrational frequency analyses were carried out from the optimized transition state.

## LOD and LOQ determination

The limit of detection and quantitation was determined from the linear regression of the fluorescence intensities' ratio at 615 nm and 455 nm versus the water content in the 0–1.8 % (v/v) range in MeCN upon excitation at 400 nm.

The limit of detection (LOD) and limit of quantitation (LOQ) are calculated according to the following equations, with  $\sigma$  being the standard deviation of the blank and S the slope of the calibration curve:

$$LOD = 3.3\sigma/S \quad LOQ = 10\sigma/S$$

The calibration equation was given by fitting the experimental data:

$$\ln(I_{615}/I_{455}) = 1.52514[H_2O] - 1.77354 \quad (R^2 = 0.99917, [H_2O] = (0-1.8 \%)$$

$$S = 1.52514 \text{ (slope of calibration curve)}$$

$\sigma = 0.005131$  (standard deviation of blank readings of ten replicate measurements at the zero level)

$$LOD = 3.3 \times 0.005131 / 1.52514 = 0.01110$$

$$LOQ = 10 \times 0.005131 / 1.52514 = 0.03364$$

## Fluorescence quantum yield determination

Based on the above data, we can obtain the fluorescence quantum yield of RAP in different solvents. Because the fluorescence spectrum is affected by the size of the slit and many factors, we use the reference method to measure the relative value. The UV-Vis spectra and the fluorescence spectra of the corresponding slit were determined by using quinine sulfate as reference, and the quantum yield of the material in different solvents was calculated according to the following equation:

$$\Phi_{sample} = \Phi_{ref} \times \frac{F_{sample} \times A_{ref} \times \eta_{sample}^2}{F_{ref} \times A_{sample} \times \eta_{ref}^2}$$

Where F is the area under the fluorescence spectral curve and A is optical density of the compound at the excitation wavelength,  $\eta$  is the refractive index of the solvent used. The standard used for the measurement of fluorescence quantum yield was quinine sulphate ( $\Phi = 0.547$  in 0.05M H<sub>2</sub>SO<sub>4</sub> aq.).

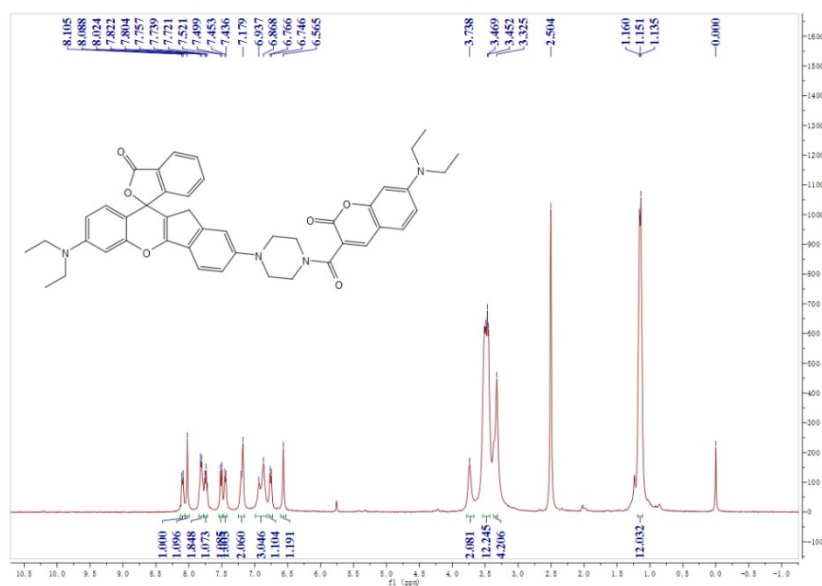

**Fig. S1.** <sup>1</sup>H NMR of RAP in DMSO-*d*<sub>6</sub>

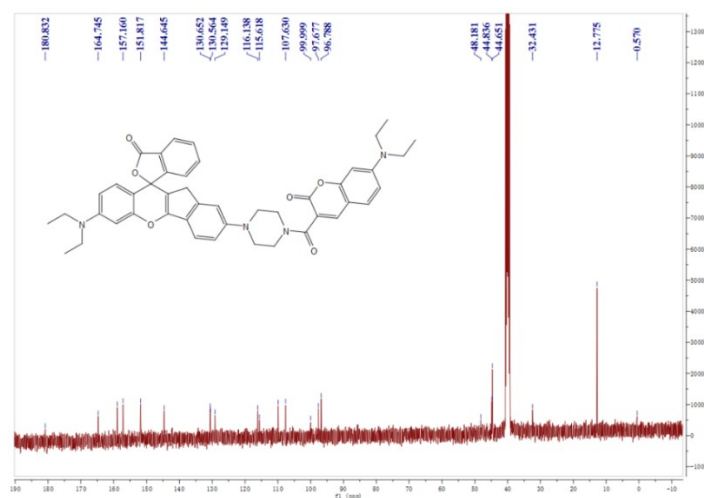

**Fig. S2.** <sup>13</sup>C NMR of RAP in DMSO-*d*<sub>6</sub>

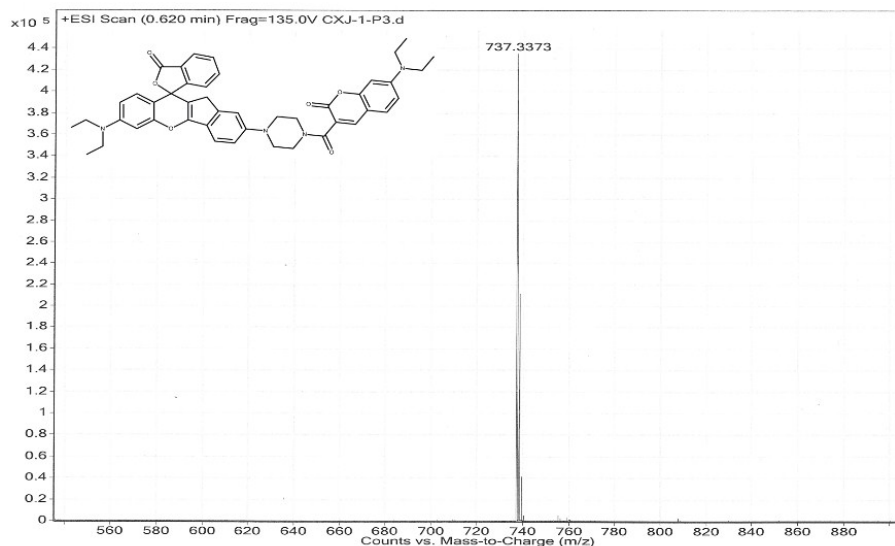

**Fig. S3.** HR-MS of RAP

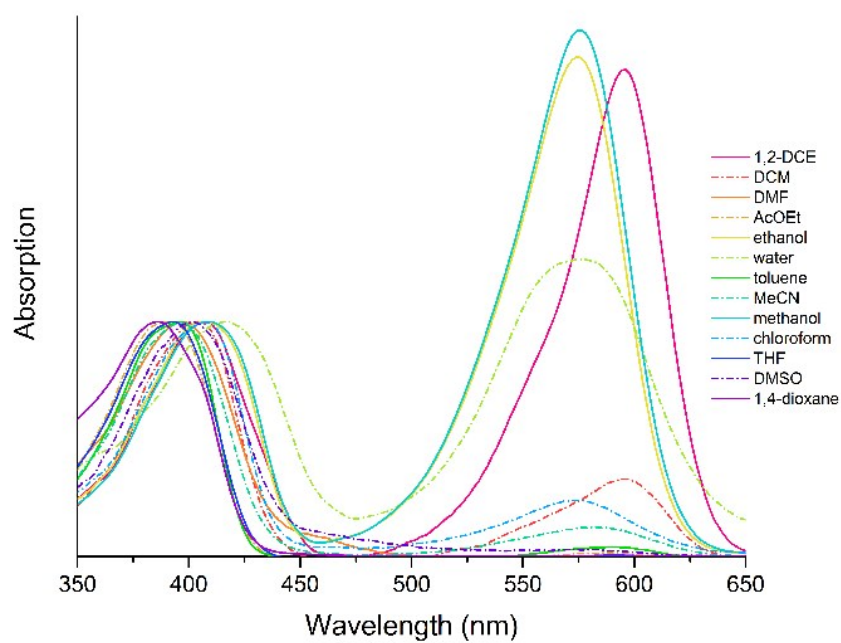

**Fig. S4.** Normalized UV-Vis spectra of RAP in different solvents

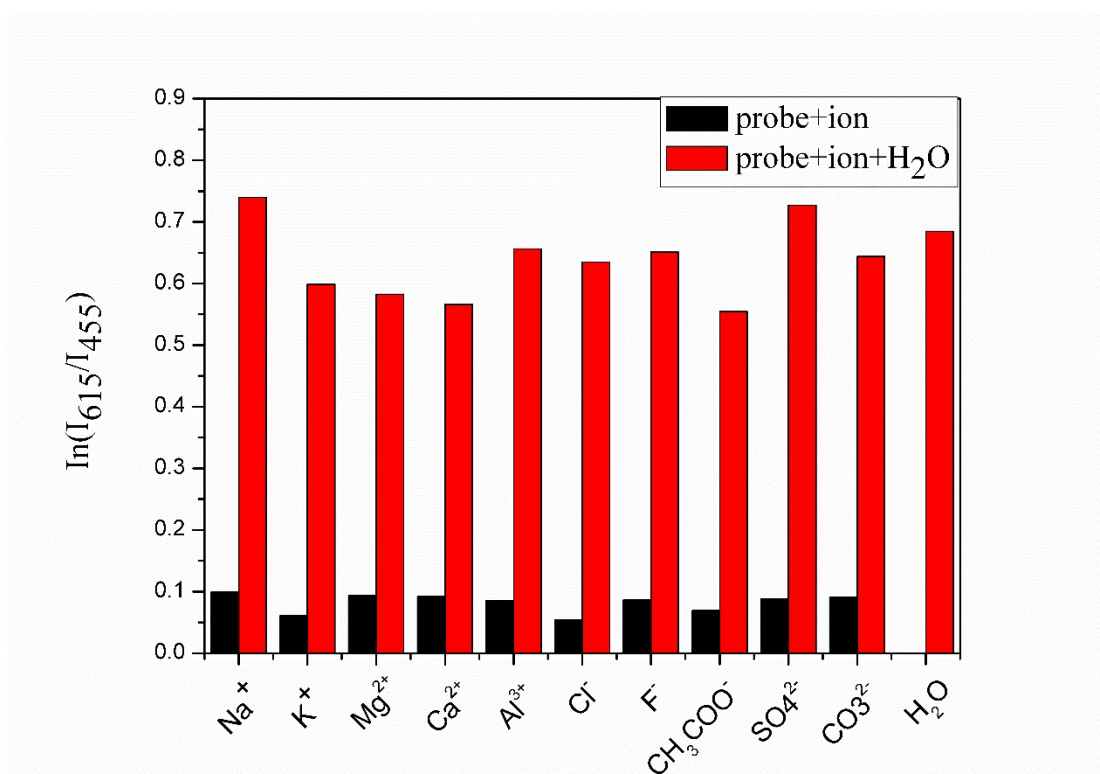

**Fig. S5** The ratiometric responses  $\ln(I_{615}/I_{455})$  of RAW ( $c = 10^{-3}$  M) with or without water in the presence of various analytes (100  $\mu$ M) in acetonitrile ( $\lambda_{\text{ex}} = 420$  nm).

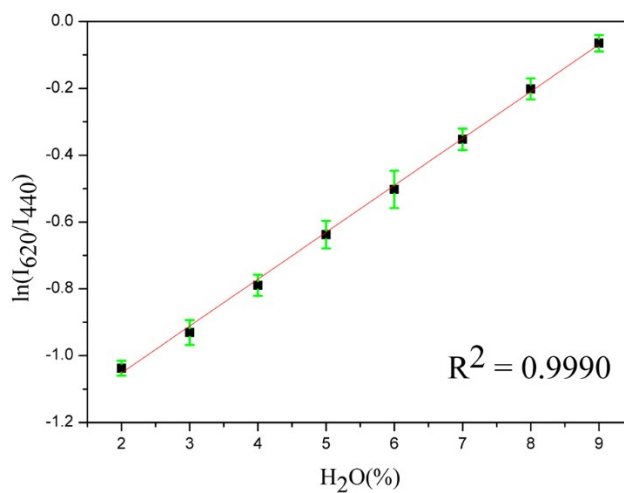

**Fig. S6** The relationship of ratio of fluorescence intensity of RAW ( $c = 10^{-3}$  M) and water content in THF ( $\lambda_{\text{ex}} = 420$  nm). Error bars ( $n = 3$ ).

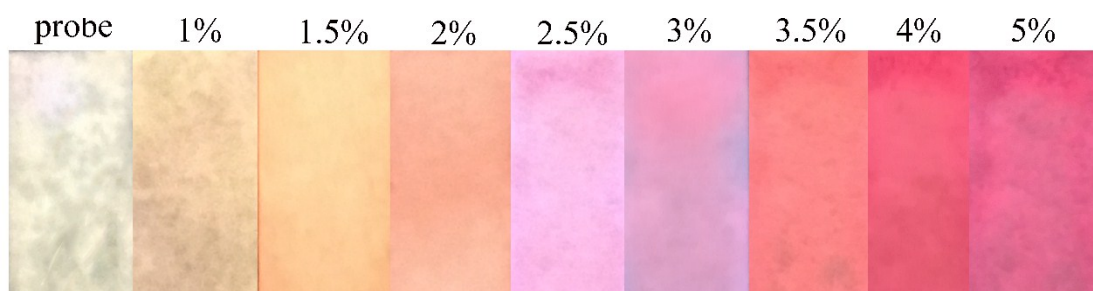

**Fig. S7** Fluorescence changes of RAW ( $10^{-3}$  M)-coated test strips after soaked in THF with different water content ( $\lambda_{ex} = 365$  nm).

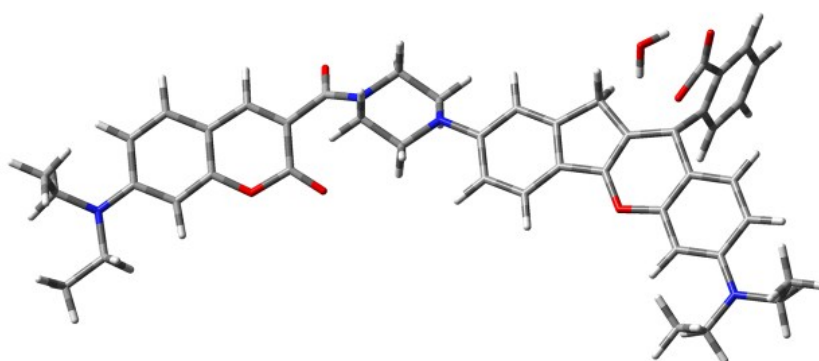

**Fig. S8.** The structure of RAW (optimized and calculated by theoretical calculation)

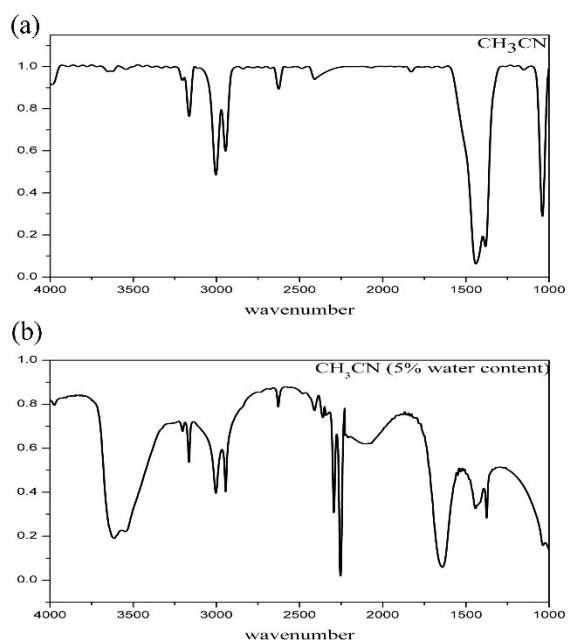

**Fig. S9** IR for RAW in acetonitrile (a) and acetonitrile with 8 % water (b).

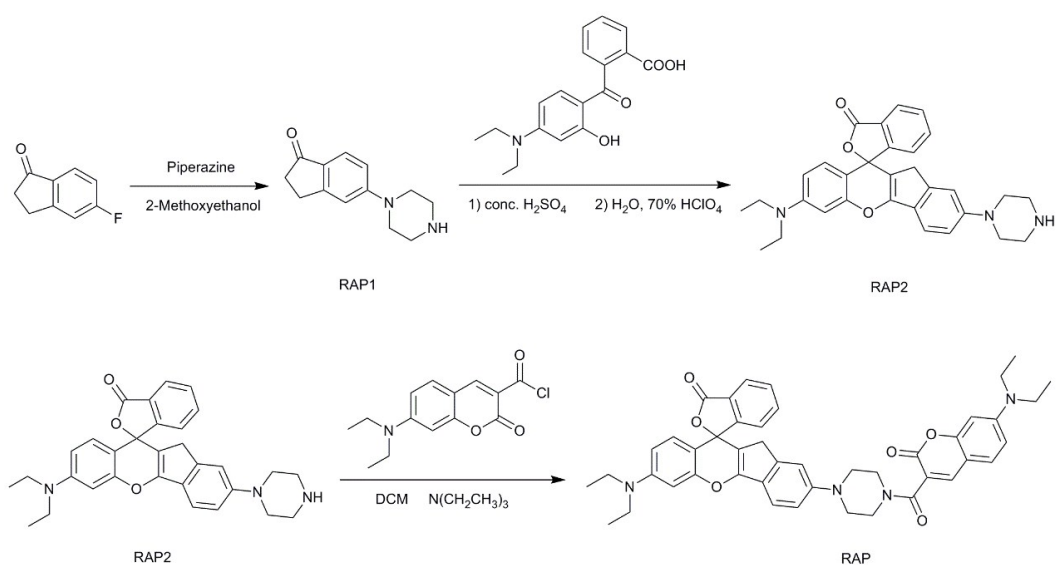

**Scheme S1.** Synthesis of probe RAP

**Table S1.** Optical properties of RAP<sup>a</sup>

| Solvent     | $E_T(30)$ | $\lambda_{\text{abs}}^b$ | $\lambda_{\text{fl}}^b$ | $\Delta\nu^b$ | $\lambda_{\text{abs}}^c$ | $\lambda_{\text{fl}}^c$ | $\Delta\nu^c$ | $\Phi_F$ |
|-------------|-----------|--------------------------|-------------------------|---------------|--------------------------|-------------------------|---------------|----------|
| toluene     | 33.9      | 396                      | 434                     | 2211.1        | 590                      | 612                     | 609.3         | 0.0376   |
| 1,4-dioxane | 36        | 386                      | 441                     | 3231.0        |                          |                         |               | 0.0147   |
| THF         | 37.4      | 393                      | 443                     | 2871.9        |                          |                         |               | 0.0859   |
| AcOEt       | 38.1      | 390                      | 443                     | 3067.7        | 591                      | 617                     | 713.0         | 0.0738   |
| chloroform  | 39.1      | 408                      | 447                     | 2138.4        | 574                      | 602                     | 810.3         | 0.1997   |
| DCM         | 40.7      | 403                      | 448                     | 2492.5        | 596                      | 621                     | 675.5         | 0.1362   |
| 1,2-DCE     | 41.3      | 407                      | 451                     | 2397.1        | 596                      | 629                     | 880.3         | 0.2430   |
| DMF         | 43.2      | 397                      | 457                     | 3307.1        |                          |                         |               | 0.0906   |
| DMSO        | 45.1      | 402                      | 461                     | 3183.6        |                          |                         |               | 0.0552   |
| MeCN        | 45.6      | 396                      | 455                     | 3274.5        | 582                      | 616                     | 948.4         | 0.0630   |
| ethanol     | 51.9      | 407                      | 458                     | 2736.0        | 574                      | 620                     | 1292.6        | 0.2893   |
| methanol    | 55.4      | 409                      | 459                     | 2663.4        | 576                      | 622                     | 1283.9        | 0.2096   |
| water       | 63.1      | 417                      | 467                     | 2567.5        | 576                      | 628                     | 1437.5        | 0.0404   |

<sup>a</sup>The dye concentration was 100  $\mu\text{M}$ ,  $\lambda_{\text{ex}} = 400 \text{ nm}$ , <sup>b</sup> coumarin derivatives fluorophores, <sup>c</sup> acceptor fluorophores.

$$\Delta\nu = \nu_{abs} - \nu_{fl} \quad (1)$$

$$\Phi_{sample} = \Phi_{ref} \times \frac{F_{sample} \times A_{ref} \times \eta_{sample}^2}{F_{ref} \times A_{sample} \times \eta_{ref}^2} \quad (2)$$

**Table S2.** Fitting results to the absorption maxima ( $\nu_{abs}$ ), fluorescence maxima ( $\nu_{fl}$ ) and Stokes shift ( $\Delta\nu$ ) of RAP on the Catalan solvent parameter.

| A                        | A <sub>0</sub> | SP     | SdP    | SA     | SB     | R <sup>2</sup> <sup>a</sup> |
|--------------------------|----------------|--------|--------|--------|--------|-----------------------------|
| $\nu_{abs}$ <sup>b</sup> | 26748          | -1709  | -859   | -1021  | 691    | 0.750                       |
| $\nu_{fl}$ <sup>b</sup>  | 24048          | -900   | 1380   | -636   | -237   | 0.946                       |
| $\Delta\nu$ <sup>b</sup> | 2700.3         | -808   | -520.9 | -385.7 | 927.7  | 0.557                       |
| $\nu_{abs}$ <sup>c</sup> | 18092          | -1323  | -154   | 378    | -44    | 0.419                       |
| $\nu_{fl}$ <sup>c</sup>  | 18256          | -2056  | -597   | -260   | -481   | 0.385                       |
| $\Delta\nu$ <sup>c</sup> | -164.07        | 733.07 | 442.97 | 637.68 | 437.31 | 0.914                       |

<sup>a</sup> R<sup>2</sup> < 0.6 no linearity, 0.6 < R<sup>2</sup> < 0.8 poor linearity, R<sup>2</sup> > 0.8 good linearity, <sup>b</sup> represents coumarin derivatives fluorophores, <sup>c</sup> represents acceptor fluorophores.

**Table S3.** The G of different structures in different solvents (the data was calculated by DFT and TD-DFT)

| G (Gibbs free energy)                    | RAP            | RAPW           | $\Delta G = G_{RAP} - G_{RAPW}$ |
|------------------------------------------|----------------|----------------|---------------------------------|
| G <sub>RAP</sub> (in CH <sub>3</sub> CN) | -2198.17488008 | -2198.15495097 | -0.01992911                     |
| G <sub>RAPW</sub> (in water)             | -2410.65213890 | -2410.67390453 | 0.02176563                      |
